# Supplementary material for: Nutrient Content with Different Fertilizer Management and Influence on Yield and Fruit Quality in Apple cv. Gala
Source: MDPI journal article supplement (doi:10.3390/horticulturae8080713), 2022-08-08
Supplement: s1 [file s1]

## Supplementary Material

**Table S1.** Adequate nutrient levels in leaves of apple trees cv Gala harvested at 90-110 DAFB. Values related to dry matter at 100 -105 C. According to [24].

| N (%)     | P (%)     | K (%)     | Ca (%)    | Mg (%)    | S (%)     |
|-----------|-----------|-----------|-----------|-----------|-----------|
| 2.50-3.00 | 0.14-0.20 | 1.30-2.00 | 0.90-1.60 | 0.20-0.30 | 0.22-0.30 |

**Table S2.** Means  $\pm$  standard errors of nutrient in leaves collected 90-110 DAFB. n=9

| Year | Orchard | N               | P               | K               | Ca              | Mg              | S               |
|------|---------|-----------------|-----------------|-----------------|-----------------|-----------------|-----------------|
| 2018 | A       | 2.28 $\pm$ 0.32 | 0.16 $\pm$ 0.01 | 1.50 $\pm$ 0.08 | 1.37 $\pm$ 0.10 | 0.23 $\pm$ 0.02 | 0.17 $\pm$ 0.02 |
|      | B       | 2.15 $\pm$ 0.19 | 0.16 $\pm$ 0.01 | 1.49 $\pm$ 0.08 | 1.07 $\pm$ 0.18 | 0.23 $\pm$ 0.04 | 0.18 $\pm$ 0.03 |
|      | C       | 2.73 $\pm$ 0.17 | 0.19 $\pm$ 0.01 | 1.47 $\pm$ 0.08 | 1.20 $\pm$ 0.07 | 0.31 $\pm$ 0.03 | 0.18 $\pm$ 0.01 |
|      | D       | 2.51 $\pm$ 0.24 | 0.17 $\pm$ 0.01 | 1.22 $\pm$ 0.09 | 1.49 $\pm$ 0.11 | 0.26 $\pm$ 0.02 | 0.23 $\pm$ 0.03 |
|      | E       | 2.34 $\pm$ 0.34 | 0.19 $\pm$ 0.02 | 1.29 $\pm$ 0.08 | 1.47 $\pm$ 0.11 | 0.28 $\pm$ 0.02 | 0.21 $\pm$ 0.02 |
| 2019 | A       | 2.01 $\pm$ 0.17 | 0.18 $\pm$ 0.01 | 1.43 $\pm$ 0.07 | 1.46 $\pm$ 0.11 | 0.33 $\pm$ 0.03 | 0.20 $\pm$ 0.02 |
|      | B       | 2.07 $\pm$ 0.17 | 0.18 $\pm$ 0.01 | 1.33 $\pm$ 0.05 | 1.09 $\pm$ 0.09 | 0.30 $\pm$ 0.02 | 0.20 $\pm$ 0.01 |
|      | C       | 2.94 $\pm$ 0.43 | 0.24 $\pm$ 0.04 | 1.27 $\pm$ 0.16 | 1.41 $\pm$ 0.16 | 0.42 $\pm$ 0.06 | 0.24 $\pm$ 0.02 |
|      | D       | 2.24 $\pm$ 0.68 | 0.19 $\pm$ 0.01 | 1.27 $\pm$ 0.07 | 1.74 $\pm$ 0.12 | 0.40 $\pm$ 0.04 | 0.20 $\pm$ 0.02 |
|      | E       | 2.15 $\pm$ 0.28 | 0.21 $\pm$ 0.01 | 1.08 $\pm$ 0.05 | 1.54 $\pm$ 0.08 | 0.38 $\pm$ 0.02 | 0.23 $\pm$ 0.05 |
| 2020 | A       | 1.91 $\pm$ 0.76 | 0.16 $\pm$ 0.01 | 1.52 $\pm$ 0.16 | 1.51 $\pm$ 0.14 | 0.32 $\pm$ 0.01 | 0.21 $\pm$ 0.02 |
|      | B       | 2.10 $\pm$ 0.36 | 0.19 $\pm$ 0.01 | 1.85 $\pm$ 0.15 | 0.95 $\pm$ 0.21 | 0.25 $\pm$ 0.03 | 0.26 $\pm$ 0.04 |
|      | C       | 1.81 $\pm$ 0.56 | 0.21 $\pm$ 0.02 | 1.45 $\pm$ 0.10 | 1.23 $\pm$ 0.12 | 0.39 $\pm$ 0.03 | 0.21 $\pm$ 0.01 |
|      | D       | 1.74 $\pm$ 0.98 | 0.21 $\pm$ 0.01 | 1.35 $\pm$ 0.07 | 1.52 $\pm$ 0.07 | 0.34 $\pm$ 0.02 | 0.27 $\pm$ 0.01 |
|      | E       | 1.61 $\pm$ 0.59 | 0.17 $\pm$ 0.01 | 1.22 $\pm$ 0.05 | 1.34 $\pm$ 0.05 | 0.30 $\pm$ 0.02 | 0.23 $\pm$ 0.02 |
| 2021 | A       | 2.54 $\pm$ 0.12 | 0.17 $\pm$ 0.00 | 1.68 $\pm$ 0.09 | 1.53 $\pm$ 0.12 | 0.30 $\pm$ 0.02 | 0.21 $\pm$ 0.02 |
|      | B       | 2.39 $\pm$ 0.12 | 0.17 $\pm$ 0.01 | 1.65 $\pm$ 0.09 | 1.32 $\pm$ 0.13 | 0.28 $\pm$ 0.02 | 0.25 $\pm$ 0.01 |
|      | C       | 2.81 $\pm$ 0.13 | 0.22 $\pm$ 0.02 | 1.49 $\pm$ 0.15 | 1.65 $\pm$ 0.13 | 0.43 $\pm$ 0.04 | 0.20 $\pm$ 0.01 |
|      | D       | 2.32 $\pm$ 0.28 | 0.18 $\pm$ 0.01 | 1.53 $\pm$ 0.17 | 1.30 $\pm$ 0.09 | 0.30 $\pm$ 0.01 | 0.18 $\pm$ 0.02 |
|      | E       | 2.83 $\pm$ 0.14 | 0.20 $\pm$ 0.01 | 1.57 $\pm$ 0.19 | 1.62 $\pm$ 0.10 | 0.36 $\pm$ 0.03 | 0.20 $\pm$ 0.02 |

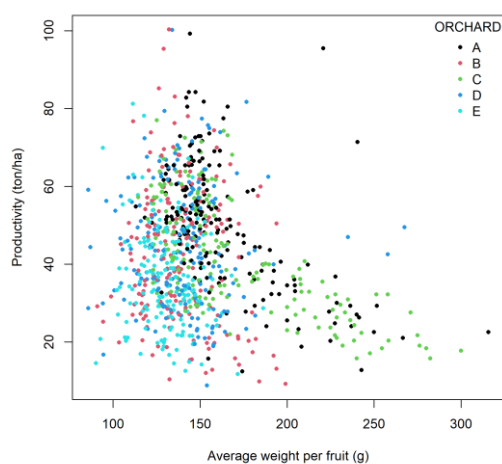

**Figure S1.** Relation between productivity (t/ha) and average fruit weight (g).(n=900)
